# Supplementary material
Source: PubMed Central journal article supplement (PMC4754546)
Supplement: mt2015169x1.pdf [file mt2015169x1.pdf]

Table S1 SCC4 and SAS xenograft model treatment group

| <b>Group</b> | <b>Treatment</b>                         | <b>Mouse number</b> |
|--------------|------------------------------------------|---------------------|
| <b>1</b>     | PBS only <sup>a</sup>                    | 5                   |
| <b>2</b>     | PDT and siScrambled <sup>b</sup>         | 5                   |
| <b>3</b>     | Photosan and siVEGF-A <sup>c</sup>       | 5                   |
| <b>4</b>     | PBS with Light and siVEGF-A <sup>d</sup> | 5                   |
| <b>5</b>     | PDT and siVEGF-A <sup>b</sup>            | 5                   |

<sup>a</sup> PBS was injected on days 0-3 and 5-8; <sup>b</sup> PDT was performed on day 0 and 5, siVEGF-A or siScrambled was injected on days 1-3 and days 6-8; <sup>c</sup> Photosan (PS) was injected on day 0 and 5, siVEGF-A was injected on days 1-3 and days 6-8; <sup>d</sup> PBS was injected on day 0 and 5 with light, siVEGF-A was injected on days 1-3 and days 6-8.
